# Supplementary material for: Body Structure, Function, Activity, and Participation in 3- to 6-Year-Old Children Born Very Preterm: An ICF-Based Systematic Review and Meta-Analysis
Source: Oxford University Press journal article supplement (doi:10.1093/ptj/pzy050), 2018-04-17
Supplement: ptj_98_8_691_s1.zip [file ptj_98_8_691_s1.zip]

Archive with 6 entries (6 files):
- e-Appendix 6 FITZGERALD.pdf
- eAppendix 1 FITZGERALD.pdf
- eAppendix 2 FITZGERALD.docx
- eAppendix 3 FITZGERALD.pdf
- eAppendix 4 FITZGERALD.pdf
- eAppendix 5 FITZGERALD.pdf
