# Supplementary material for: Body Structure, Function, Activity, and Participation in 3- to 6-Year-Old Children Born Very Preterm: An ICF-Based Systematic Review and Meta-Analysis
Source: Oxford University Press journal article supplement (doi:10.1093/ptj/pzy050), 2018-04-17
Supplement: ptj_98_8_691_s1.zip [file ptj_98_8_691_s1.zip]

## e-Appendix 1: Detailed Search strategy

### MEDLINE

| ICF Domain                  | Population Terms                                                                                                                 | Intervention Terms                                                                                                                                                                                                                                | Outcome Terms                                                                                                                                                                                                                                                                                                                                                                                                                                                                                        |
|-----------------------------|----------------------------------------------------------------------------------------------------------------------------------|---------------------------------------------------------------------------------------------------------------------------------------------------------------------------------------------------------------------------------------------------|------------------------------------------------------------------------------------------------------------------------------------------------------------------------------------------------------------------------------------------------------------------------------------------------------------------------------------------------------------------------------------------------------------------------------------------------------------------------------------------------------|
| Body Structure and Function | (MH "Child+") OR (MH "Pediatrics+") OR "paediatric" OR (MH "Child, Preschool") OR "pre-school" OR "kindergarten" OR "school age" | (MH "Infant, Extremely Premature") OR (MH "Infant, Premature+") OR (MH "Infant, Very Low Birth Weight+") OR "preterm infant" OR "pre-term infant" OR "very pre-term infant" OR "very preterm infant" OR (MH "Infant, Extremely Low Birth Weight") | (MH "Muscle Strength+") OR (MH "Muscle Hypertonia+") OR (MH "Muscle Hypotonia") OR "muscle power" OR "muscle endurance" OR "muscle length" OR (MH "Joint Instability") OR "joint contracture" OR "range of movement" OR (MH "Range of Motion, Articular+") OR (MH "Musculoskeletal System+") OR (MH "Posture+") OR "postural control" OR (MH "Postural Balance") OR "postural stability" OR (MH "Physical Fitness") OR "aerobic fitness" OR "cardiorespiratory fitness" OR (MH "Physical Endurance") |
| Activity                    | (MH "Child+") OR (MH "Pediatrics+") OR "paediatric" OR (MH "Child, Preschool") OR "pre-school" OR "kindergarten" OR "school age" | (MH "Infant, Extremely Premature") OR (MH "Infant, Premature+") OR (MH "Infant, Very Low Birth Weight+") OR "preterm infant" OR "pre-term infant" OR "very pre-term infant" OR "very preterm infant" OR (MH "Infant, Extremely Low Birth Weight") | ("gross motor" OR (MH "Motor Skills") OR (MH "Motor Skills Disorders") OR "motor competence" OR "motor co-ordination" OR (MH "Gait") OR (MH "Walking+") OR "mobility" OR "fine motor" OR (MH "Activities of Daily Living+") OR (MH "Motor Activity+") OR "motor task" OR "motor function")                                                                                                                                                                                                           |
| Participation               | (MH "Child+") OR (MH "Pediatrics+") OR "paediatric" OR (MH "Child, Preschool") OR "pre-school" OR "kindergarten" OR "school age" | (MH "Infant, Extremely Premature") OR (MH "Infant, Premature+") OR (MH "Infant, Very Low Birth Weight+") OR "preterm infant" OR "pre-term infant" OR "very pre-term infant" OR "very preterm infant" OR (MH "Infant, Extremely Low Birth Weight") | (MH "Motor Activity+") OR (MH "Exercise+") OR "physical activity" OR (MH "Social Participation") OR "participation" OR (MH "Leisure Activities+") OR "life situation" OR "play participation" OR (MH "Recreation+") OR (MH "Games, Recreational") OR (MH "Sports+") OR (MH "International Classification of Functioning, Disability and Health") OR "activities of daily living"                                                                                                                     |

Population, intervention and outcome terms combined with 'AND', OR= Boolean operator used in database searching, MH= mesh headings, += search term exploded.

## CINAHL

| ICF Domain                  | Population Terms                                                                                                                                         | Intervention Terms                                                                                                                                                                                                                                                                                                            | Outcome Terms                                                                                                                                                                                                                                                                                                                                                                                                                                                                                                                                                                                                                                    |
|-----------------------------|----------------------------------------------------------------------------------------------------------------------------------------------------------|-------------------------------------------------------------------------------------------------------------------------------------------------------------------------------------------------------------------------------------------------------------------------------------------------------------------------------|--------------------------------------------------------------------------------------------------------------------------------------------------------------------------------------------------------------------------------------------------------------------------------------------------------------------------------------------------------------------------------------------------------------------------------------------------------------------------------------------------------------------------------------------------------------------------------------------------------------------------------------------------|
| Body Structure and Function | (MH "Child+") OR "paediatric" OR "pediatric" OR (MH "Child, Preschool") OR "pre-school" OR "kindergarten" OR (MH "Students, Elementary") OR "school age" | (MM "Infant, Premature") OR (MH "Infant, Premature, Diseases+") OR (MH "Infant, High Risk") OR (MM "Infant, Very Low Birth Weight") OR "pre-term infant" OR "preterm infant" OR "very preterm infant" OR "very pre-term infant" OR "extremely preterm infant" OR "extremely pre-term infant" OR "extremely low birth weight") | (MH "Muscle Strength+") OR (MH "Muscle Strengthening+") OR "muscle power" OR "muscle endurance" OR "muscle length" OR "joint contracture" OR (MH "Joint Movement: Passive (Iowa NOC)") OR (MH "Joint Movement: Active (Iowa NOC)") OR (MH "Range of Motion") OR (MH "Musculoskeletal Abnormalities+") OR (MH "Musculoskeletal System Physiology+") OR (MH "Musculoskeletal System") OR (MH "Deconditioning") OR (MH "Posture+") OR (MH "Balance, Postural") OR "postural control" OR (MH "Stability+") OR (MH "Balance (Iowa NOC)") OR (MH "Physical Fitness") OR "aerobic fitness" OR "cardiorespiratory fitness" OR (MH "Physical Endurance+") |
| Activity                    | (MH "Child+") OR "paediatric" OR "pediatric" OR (MH "Child, Preschool") OR "pre-school" OR "kindergarten" OR (MH "Students, Elementary") OR "school age" | (MM "Infant, Premature") OR (MH "Infant, Premature, Diseases+") OR (MH "Infant, High Risk") OR (MM "Infant, Very Low Birth Weight") OR "pre-term infant" OR "preterm infant" OR "very preterm infant" OR "very pre-term infant" OR "extremely preterm infant" OR "extremely pre-term infant" OR "extremely low birth weight") | (MH "Motor Skills+") OR "gross motor" OR "motor competence" OR "motor co-ordination" OR (MH "Gait") OR (MH "Walking") OR (MH "Physical Mobility") OR "fine motor" OR (MH "Activities of Daily Living+") OR (MH "Motor Activity+") OR "motor skills disorders" OR "motor task" OR "motor function"                                                                                                                                                                                                                                                                                                                                                |
| Participation               | (MH "Child+") OR "paediatric" OR "pediatric" OR (MH "Child, Preschool") OR "pre-school" OR "kindergarten" OR (MH "Students, Elementary") OR "school age" | (MM "Infant, Premature") OR (MH "Infant, Premature, Diseases+") OR (MH "Infant, High Risk") OR (MM "Infant, Very Low Birth Weight") OR "pre-term infant" OR "preterm infant" OR "very preterm infant" OR "very pre-term infant" OR "extremely preterm infant" OR "extremely pre-term infant" OR "extremely low birth weight") | (MH "Physical Activity") OR (MH "Physical Activity (Omaha)") OR (MH "Exercise+") OR (MH "Sports Participation") OR (MH "Social Participation") OR (MH "Play Participation (Iowa NOC)") OR (MH "Leisure Participation (Iowa NOC)") OR "life situation" OR (MH "Recreation") OR (MH "International Classification of Functioning, Disability, and Health") OR "activities of daily living"                                                                                                                                                                                                                                                         |

Population, intervention and outcome terms combined with 'AND', OR= Boolean operator used in database searching, MH= cinahl headings, MM= major concept, += search term exploded.

## EMBASE

| ICF Domain                  | Population Terms                                                                                            | Intervention Terms                                                                                                                                                                       | Outcome Terms                                                                                                                                                                                                                                                                                       |
|-----------------------------|-------------------------------------------------------------------------------------------------------------|------------------------------------------------------------------------------------------------------------------------------------------------------------------------------------------|-----------------------------------------------------------------------------------------------------------------------------------------------------------------------------------------------------------------------------------------------------------------------------------------------------|
| Body Structure and Function | child+ OR preschool child+ OR kindergarten OR child care OR school OR paediatric OR pediatric OR school age | Prematurity+ OR exp very low birth weight OR extremely low birth weight+ OR preterm infant or pre-term infant OR very preterm infant OR very pre-term infant OR extremely preterm infant | (Musc* strength OR musc* power OR musc* endurance OR musc* length OR joint contracture OR range of movement OR range of motion OR musculoskeletal OR posture OR postural control OR postural stability OR balance OR physical fitness OR aerobic fitness OR cardiorespiratory fitness OR endurance) |
| Activity                    | child+ OR preschool child+ OR kindergarten OR child care OR school OR paediatric OR pediatric OR school age | Prematurity+ OR exp very low birth weight OR extremely low birth weight+ OR preterm infant or pre-term infant OR very preterm infant OR very pre-term infant OR extremely preterm infant | motor function*+ OR motor performance+ OR motor control+ OR motor coordination+ OR motor development+ OR motor dysfunction+ OR gait+ OR walking+ OR daily life activity+ OR (motor competence OR motor co-ordination OR mobility OR fine motor or activity).                                        |
| Participation               | child+ OR preschool child+ OR kindergarten OR child care OR school OR paediatric OR pediatric OR school age | Prematurity+ OR exp very low birth weight OR extremely low birth weight+ OR preterm infant or pre-term infant OR very preterm infant OR very pre-term infant OR extremely preterm infant | physical activity+ OR "physical activity, capacity and performance" OR physical capacity OR exercise+ OR leisure+ OR life+ OR play+ OR recreation+ OR sport+ OR "International Classification of Functioning, Disability and Health"                                                                |

Population, intervention and outcome terms combined with 'AND' OR= Boolean operator used in database searching, \* = Truncator used in database searching, += search term exploded

## PSYCINFO

| ICF Domain                  | Population Terms                                                                              | Intervention Terms                                                                                                                                                                                                     | Outcome Terms                                                                                                                                                                                                                                                                                                                                                                     |
|-----------------------------|-----------------------------------------------------------------------------------------------|------------------------------------------------------------------------------------------------------------------------------------------------------------------------------------------------------------------------|-----------------------------------------------------------------------------------------------------------------------------------------------------------------------------------------------------------------------------------------------------------------------------------------------------------------------------------------------------------------------------------|
| Body Structure and Function | (Child* OR paediatric OR pediatric OR preschool OR pre-school OR kindergarten OR school age*) | (Premature infant or preterm infant or pre-term infant or very preterm infant or very pre-term infant or extremely preterm infant or extremely pre-term infant or Very Low Birth Weight or Extremely Low Birth Weight) | (musc* length OR musc* power OR balance) OR PHYSICAL ENDURANCE+ OR ENDURANCE+ OR PHYSICAL FITNESS+ OR Aerobic Exercise+ OR MUSCULOSKELETAL DISORDERS+ OR Joint Disorders+ OR Posture+ OR Muscular Disorders+ OR Motor Performance+ OR Physical Strength+ OR Muscles+ OR exp Motor Processes+ OR Exercise+                                                                         |
| Activity                    | (Child* OR paediatric OR pediatric OR preschool OR pre-school OR kindergarten OR school age*) | (Premature infant or preterm infant or pre-term infant or very preterm infant or very pre-term infant or extremely preterm infant or extremely pre-term infant or Very Low Birth Weight or Extremely Low Birth Weight) | Childhood Development+ OR Motor Skills+ OR Motor Processes+ OR Motor Development+ OR Gross Motor Skill Learning+ OR Self Perception+ OR Physical Activity+ OR Childhood Development+ OR Motor Performance+ OR Physical Fitness OR Motor Coordination OR GAIT+ OR WALKING+ OR PHYSICAL MOBILITY+ OR Fine Motor Skill Learning+ OR "Activities of Daily Living"+ OR ACTIVITY LEVEL+ |
| Participation               | (Child* OR paediatric OR pediatric OR preschool OR pre-school OR kindergarten OR school age*) | (Premature infant or preterm infant or pre-term infant or very preterm infant or very pre-term infant or extremely preterm infant or extremely pre-term infant or Very Low Birth Weight or Extremely Low Birth Weight) | Life Experiences+ OR "Quality of Life"+ OR Childhood Play Development+ OR (international classification of functioning, disability and health) OR SPORTS+ OR Recreation+ OR Daily Activities+ OR Leisure Time+ OR PARTICIPATION+ OR Exercise OR ACTIVITY LEVEL OR PHYSICAL ACTIVITY                                                                                               |

Population, intervention and outcome terms combined with 'AND', OR= Boolean operator used in database searching, \*= Truncator used in database searching, += search term exploded
