# Supplementary material for: Body Structure, Function, Activity, and Participation in 3- to 6-Year-Old Children Born Very Preterm: An ICF-Based Systematic Review and Meta-Analysis
Source: Oxford University Press journal article supplement (doi:10.1093/ptj/pzy050), 2018-04-17
Supplement: ptj_98_8_691_s1.zip [file ptj_98_8_691_s1.zip]

e-Appendix 3: Body Structure and Function Domain, relative risk of neurological dysfunction measured by the Touwen Neurological Examination.

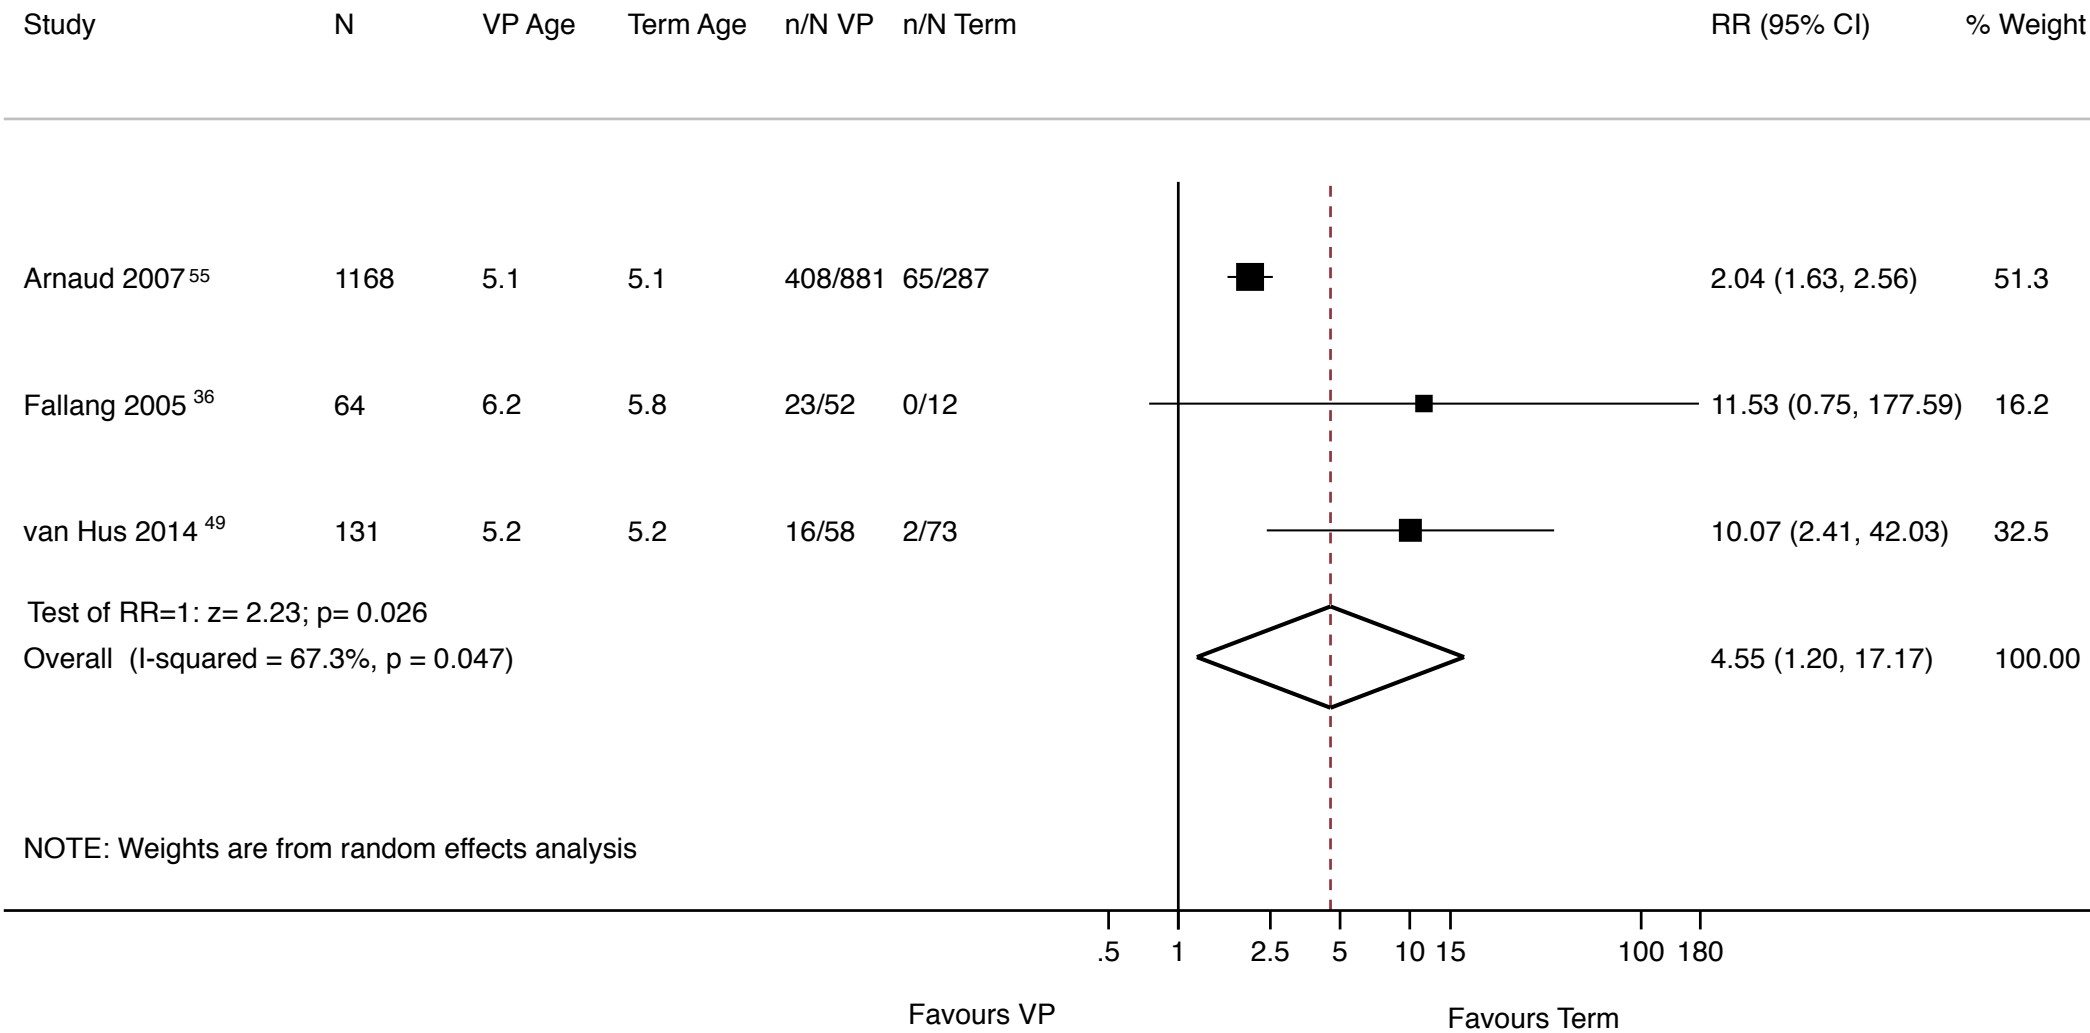

N; number of participants, VP; preterm, n/N; number of events/total number of participants, RR; relative risk, CI; confidence interval
