# Supplementary material for: Body Structure, Function, Activity, and Participation in 3- to 6-Year-Old Children Born Very Preterm: An ICF-Based Systematic Review and Meta-Analysis
Source: Oxford University Press journal article supplement (doi:10.1093/ptj/pzy050), 2018-04-17
Supplement: ptj_98_8_691_s1.zip [file ptj_98_8_691_s1.zip › e-Appendix 6 FITZGERALD.pdf]

## e-Appendix 6: Activity Domain, subgroup analysis comparing studies using corrected versus chronological age.

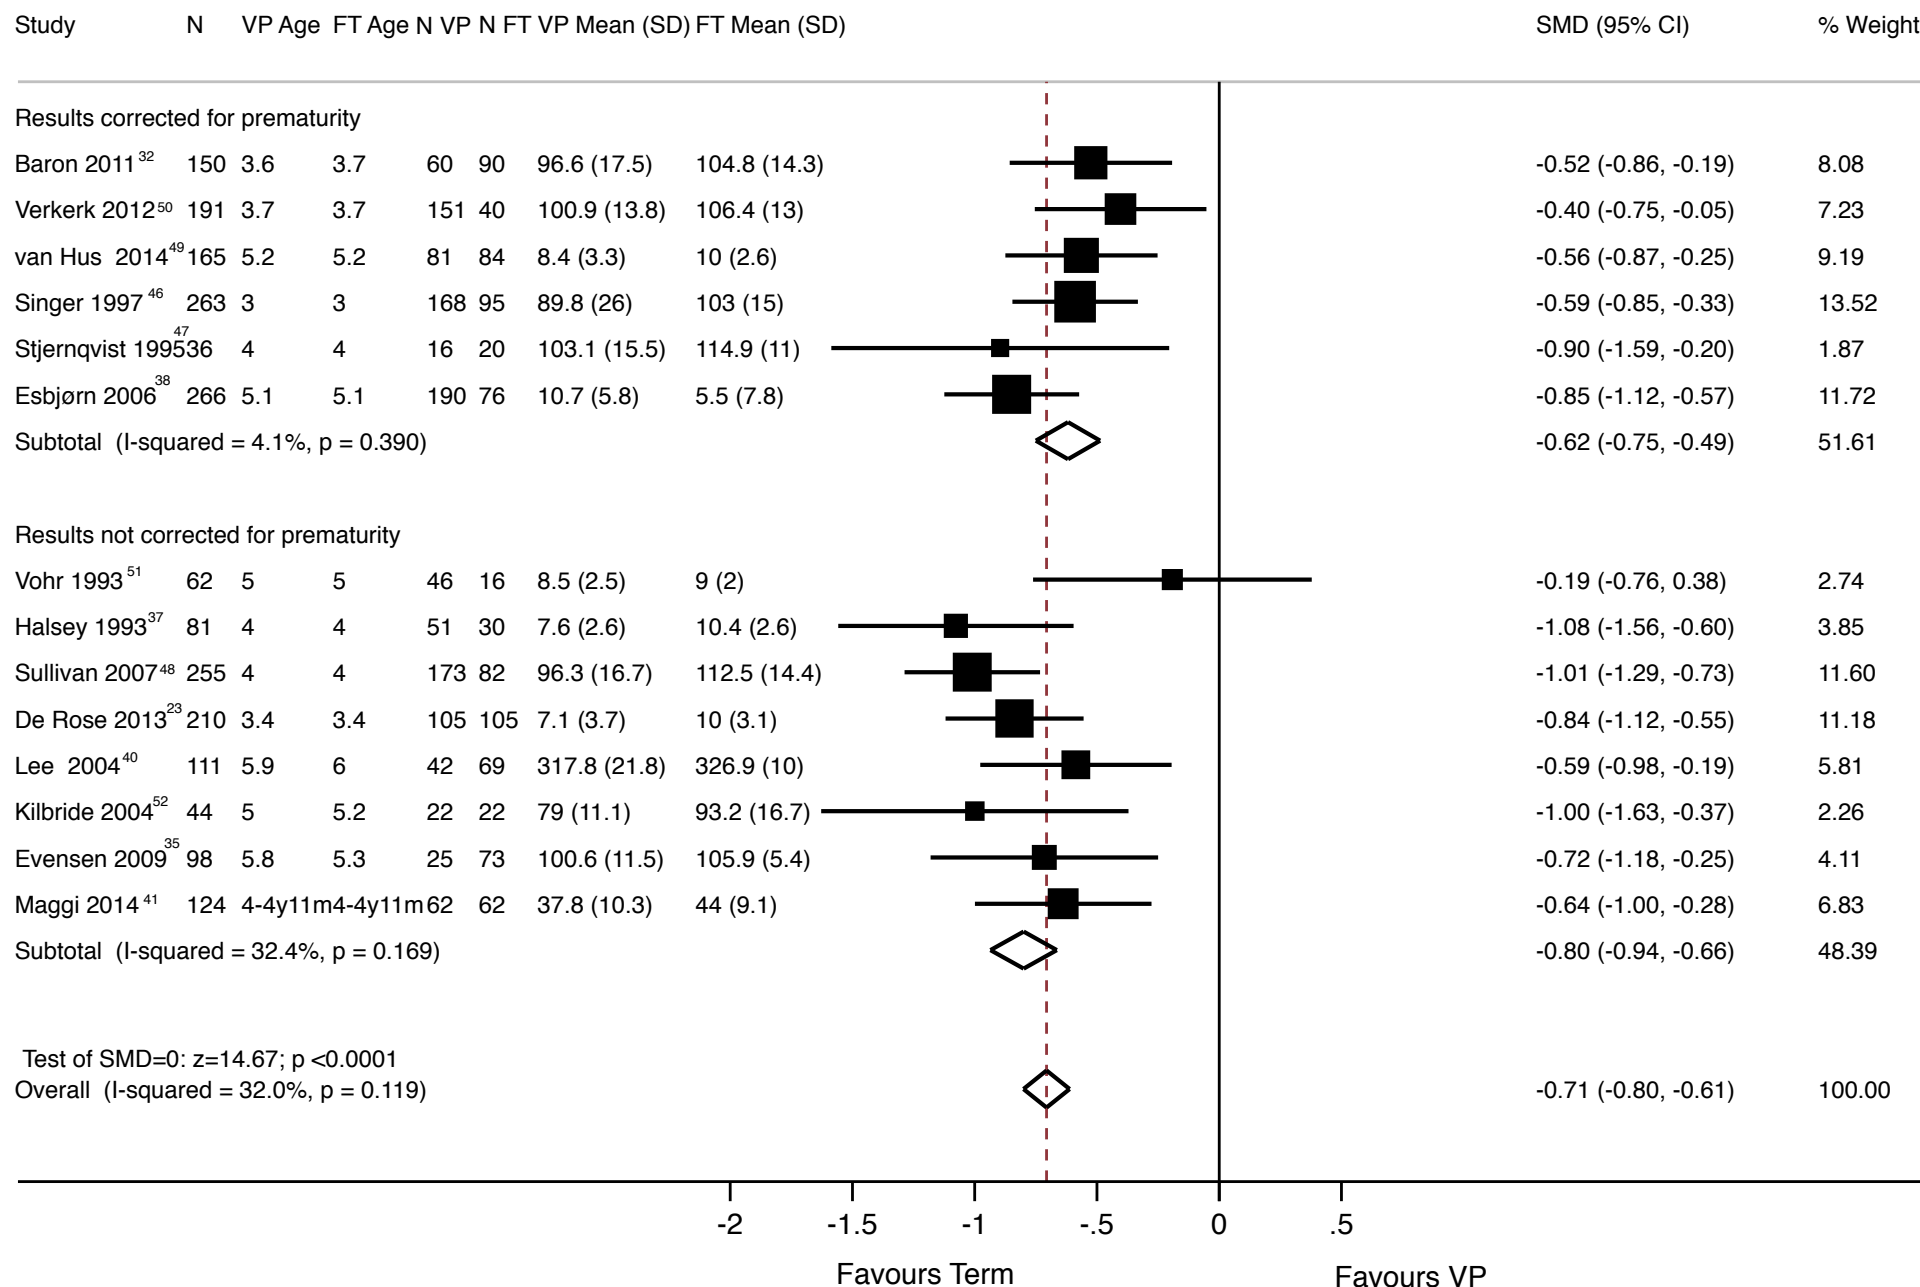

N; number of participants, VP; very preterm, FT; full term, SD; standard deviation, SMD; standardized mean difference, CI; confidence interval, y; year, m; month.
