# Supplementary material for: Body Structure, Function, Activity, and Participation in 3- to 6-Year-Old Children Born Very Preterm: An ICF-Based Systematic Review and Meta-Analysis
Source: Oxford University Press journal article supplement (doi:10.1093/ptj/pzy050), 2018-04-17
Supplement: ptj_98_8_691_s1.zip [file ptj_98_8_691_s1.zip › eAppendix 2 FITZGERALD.docx]

**e-Appendix 2:** **Quality Assessment – ranked by total score; then alphabetically by first author**

| **Author & Year** | **Representative *** | **Selection** † | **Exposure** ‡ | **Outcome 1**  § | **Age** # | **Other** || | **Outcome 2** ** | | **Follow up** †† | **Adequacy** ‡‡ | **Total** §§ |
| --- | --- | --- | --- | --- | --- | --- | --- | --- | --- | --- | --- |
| Baron 2011 32 |  |  |  |  |  |  | |  |  |  | 8 |
| Bylund 1998 57 |  |  |  |  |  |  | |  |  |  | 8 |
| De Rose 2013 23 |  |  |  |  |  |  | |  |  |  | 8 |
| Maggi 2014 41 |  |  |  |  |  |  | |  |  |  | 8 |
| Andersson 2016 54 |  |  |  |  |  |  | |  |  |  | 7 |
| Arnaud 2007 55 |  |  |  |  |  |  | |  |  |  | 7 |
| Chen 2004 33 |  |  |  |  |  |  | |  |  |  | 7 |
| Esbjørn 2006 38 |  |  |  |  |  |  | |  |  |  | 7 |
| Gäddlin 2008 59 |  |  |  |  |  |  | |  |  |  | 7 |
| Halsey 1993 37 |  |  |  |  |  |  | |  |  |  | 7 |
| Herrgard 1993 60 |  |  |  |  |  |  | |  |  |  | 7 |
| Keller 2000 66 |  |  |  |  |  |  | |  |  |  | 7 |
| Liebhardt 2000 61 |  |  |  |  |  |  | |  |  |  | 7 |
| Lorefice 2015 53 |  |  |  |  |  |  | |  |  |  | 7 |
| Oliveira 2011 42 |  |  |  |  |  |  | |  |  |  | 7 |
| Stjernqvist 1995 47 |  |  |  |  |  |  | |  |  |  | 7 |
| Torrioli 2000 64 |  |  |  |  |  |  | |  |  |  | 7 |
| Bucci 2015 56 |  |  |  |  |  |  | |  |  |  | 6 |
| Davis 1993 58 |  |  |  |  |  |  | |  |  |  | 6 |
| Erikson 2003 34 |  |  |  |  |  |  | |  |  |  | 6 |
| Falk 1997 68 |  |  |  |  |  |  | |  |  |  | 6 |
| Fallang 2005 36 |  |  |  |  |  |  | |  |  |  | 6 |
| Keller 1998 65 |  |  |  |  |  |  | |  |  |  | 6 |
| Kerstjens 2011 39 |  |  |  |  |  |  | |  |  |  | 6 |
| Lee 2004 40 |  |  |  |  |  |  | |  |  |  | 6 |
| Marlow 2007 62 |  |  |  |  |  |  | |  |  |  | 6 |
| Rautava 2010 44 |  |  |  |  |  |  | |  |  |  | 6 |
| Sagnol 2007 63 |  |  |  |  |  |  | |  |  |  | 6 |
| Singer 1997 46 |  |  |  |  |  |  | |  |  |  | 6 |
| Sullivan 2007 48 |  |  |  |  |  |  | |  |  |  | 6 |
| Sullivan & Msall 2007 67 |  |  |  |  |  |  | |  |  |  | 6 |
| van Hus 2014 49 |  |  |  |  |  |  | |  |  |  | 6 |
| Verkerk 2012 50 |  |  |  |  |  |  | |  |  |  | 6 |
| Vohr 1992 51 |  |  |  |  |  |  | |  |  |  | 6 |
| Ozbek 2005 43 |  |  |  |  |  |  | |  |  |  | 5 |
| Schiariti 2007 45 |  |  |  |  |  |  | |  |  |  | 5 |
| Evensen 2009 35 |  |  |  |  |  |  | |  |  |  | 4 |
| Kilbride 2004 52 |  |  |  |  |  |  | |  |  |  | 3 |

NOS criteria: * Representativeness of the exposed cohort, † Selection of controls, ‡ Ascertainment of exposure, § Demonstration that the outcome of interest was not present at the start of the study, # Comparability of cohorts: study controls for age,|| Comparability of cohorts: additional factor, ** Assessment of outcome, †† Was the follow up long enough for outcomes to occur? ‡‡Adequacy of the follow up of cohorts, §§ Total star rating. Black circle: (a) star, highest rating, gray circle: (b) star, second highest rating, white circle: Zero stars, lowest rating
