# Supplementary material for: Body Structure, Function, Activity, and Participation in 3- to 6-Year-Old Children Born Very Preterm: An ICF-Based Systematic Review and Meta-Analysis
Source: Oxford University Press journal article supplement (doi:10.1093/ptj/pzy050), 2018-04-17
Supplement: ptj_98_8_691_s1.zip [file ptj_98_8_691_s1.zip › eAppendix 4 FITZGERALD.pdf]

# e-Appendix 4: Body Structure and Function Domain, outcomes unable to be pooled in meta-analysis

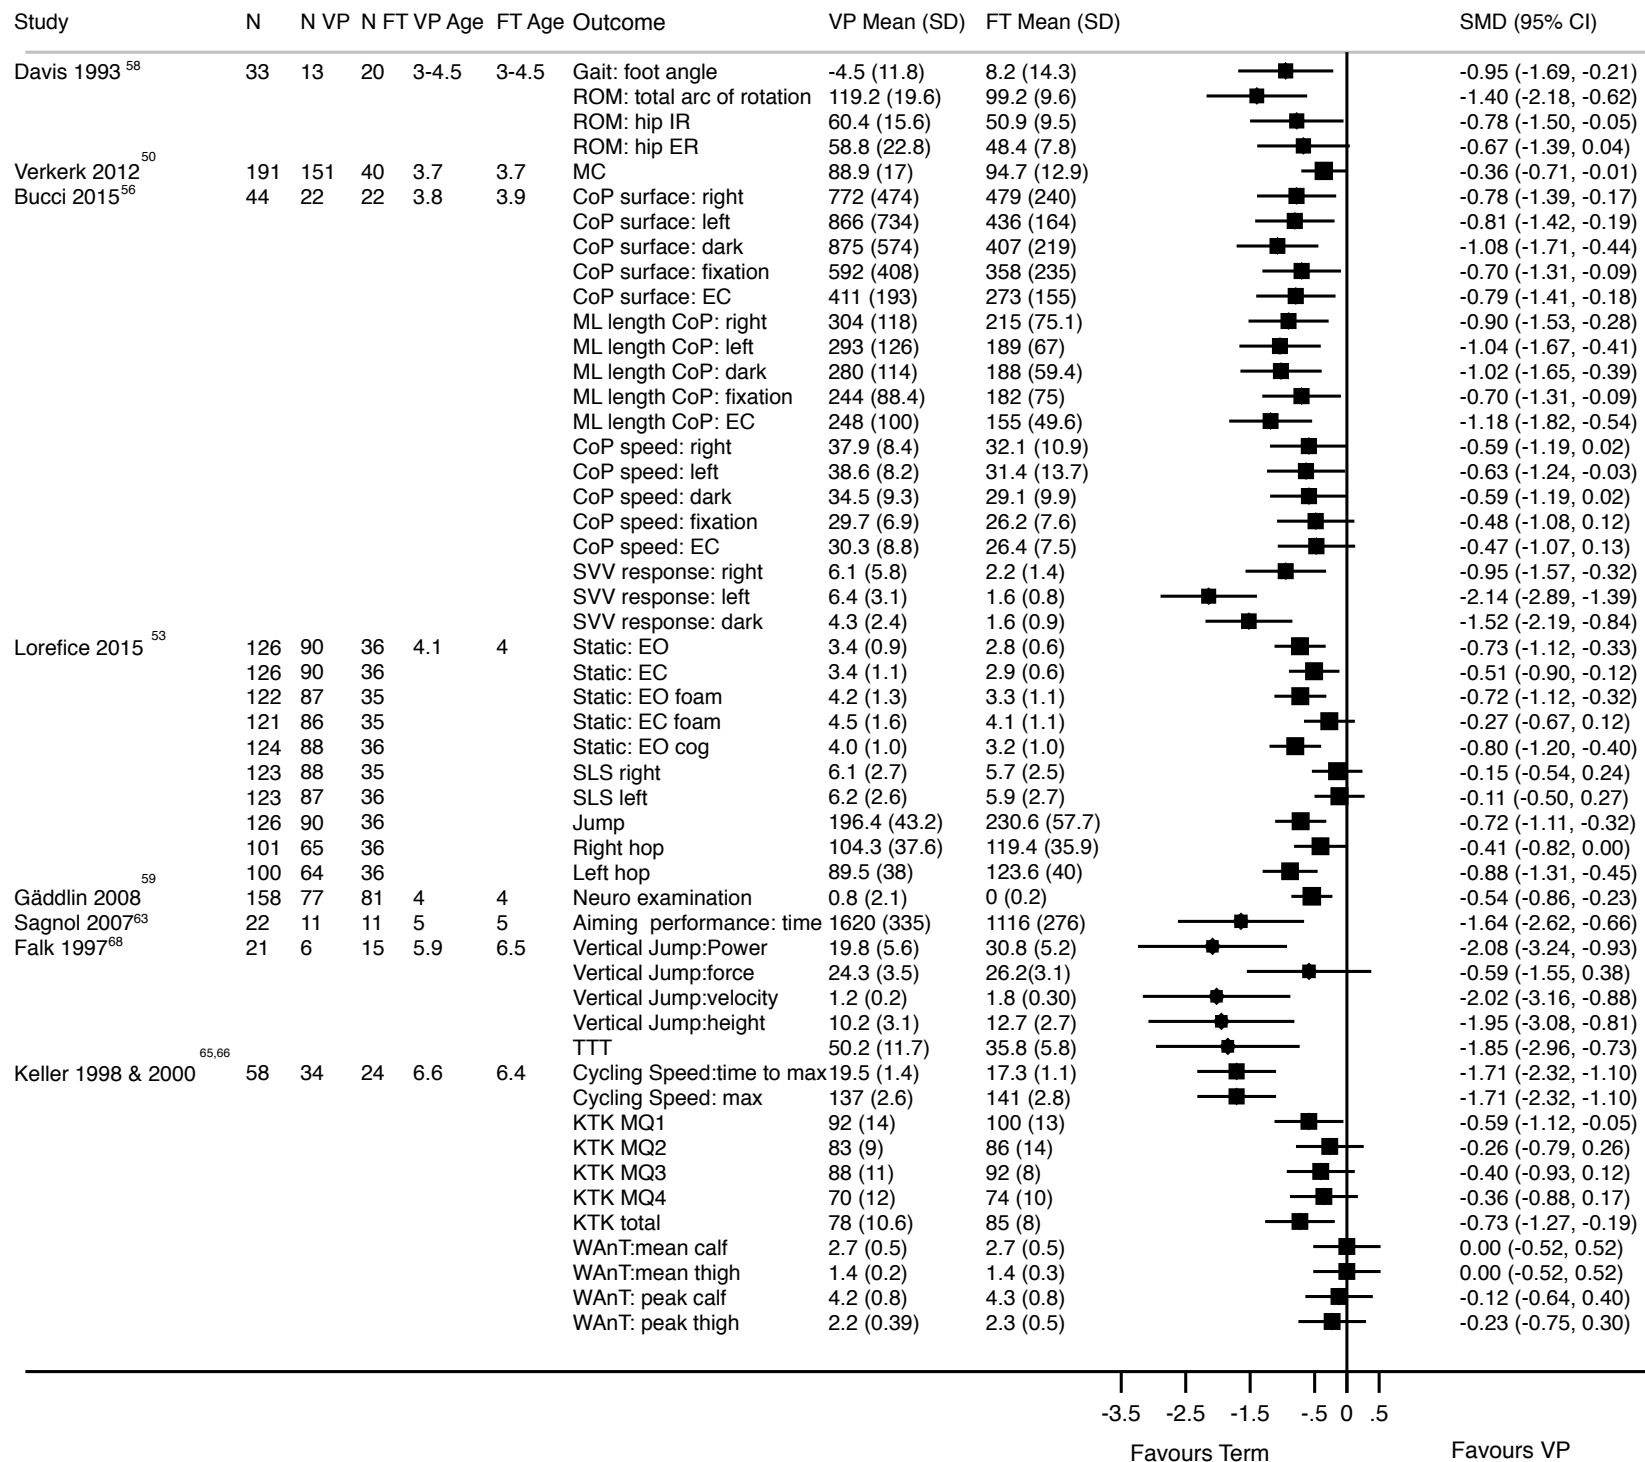

N; number of participants, VP; very preterm, FT; full term, SD; standard deviation, SMD; standardized mean difference, CI; confidence interval, ROM; range of movement, IR; internal rotation, ER; external rotation, MC; motor co-ordination subscale of Beery-Buktenica Developmental Test of Visual Motor Integration, CoP; centre of pressure, EC; eyes closed, EO; eyes open, ML; medio-lateral, SVV; subjective visual vertical, cog; cognitive task, SLS; single leg stance, TTT; vertical jump time elapsed from the point of maximal velocity to the point of take-off, max; maximum, KTK; Koerperkoordinationstest fuer Kinder (whole body coordination test for children), MQ1,2,3,4; motor quotient 1,2,3,4; WAnT; Wingate Anaerobic Test.
