# Supplementary material for: Body Structure, Function, Activity, and Participation in 3- to 6-Year-Old Children Born Very Preterm: An ICF-Based Systematic Review and Meta-Analysis
Source: Oxford University Press journal article supplement (doi:10.1093/ptj/pzy050), 2018-04-17
Supplement: ptj_98_8_691_s1.zip [file ptj_98_8_691_s1.zip › eAppendix 5 FITZGERALD.pdf]

## e-Appendix 5: Activity Domain, outcomes unable to be pooled in meta-analysis.

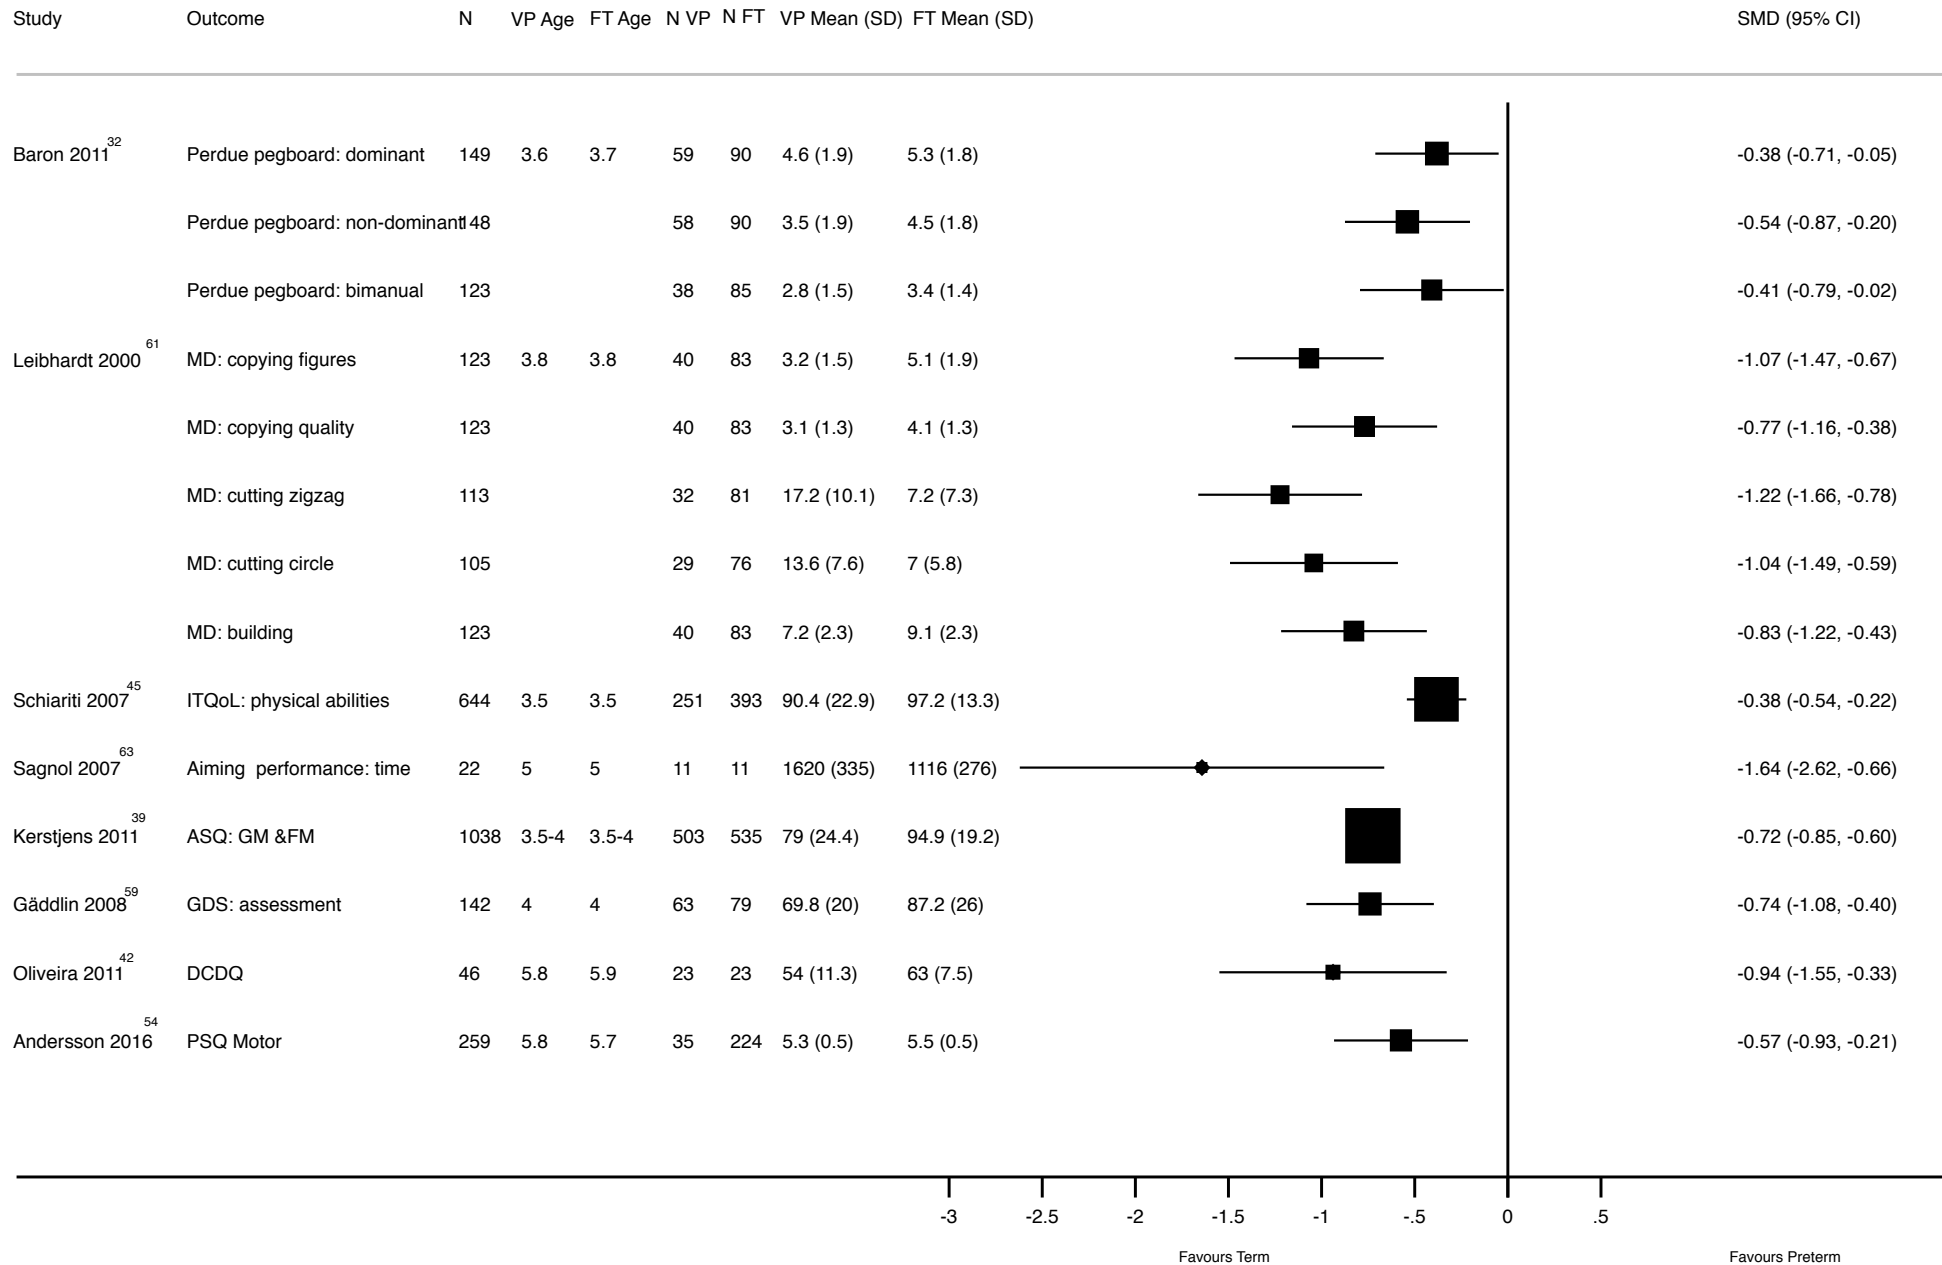

N; number of participants, VP; very preterm, SD; standard deviation, SMD; standardized mean difference, CI; confidence interval, MD; manual dexterity task, ITQoL; Infant Toddler Quality of Life Questionnaire, ASQ; Ages and Stages Questionnaire, GM; gross motor, FM; fine motor, GDS-II; Griffiths Developmental Scales, second edition, DCDQ; Developmental Coordination Disorder Questionnaire, PSQ; Performance Skills Questionnaire
